# Supplementary material for: Dendrimer-entrapped gold nanoparticles modified with folic acid for targeted gene delivery applications
Source: Royal Society of Chemistry journal article supplement (doi:10.1039/c3bm60138b), 2013-01-01
Supplement: c3bm60138b.pdf [file c3bm60138b.pdf]

## Electronic Supplementary Information

### Dendrimer-entrapped gold nanoparticles modified with folic acid for targeted gene delivery applications

Tongyu Xiao<sup>a</sup>, Wenxiu Hou<sup>a</sup>, Xueyan Cao<sup>a</sup>, Shihui Wen<sup>a</sup>, Mingwu Shen<sup>a</sup>, Xiangyang Shi<sup>a,b\*</sup>

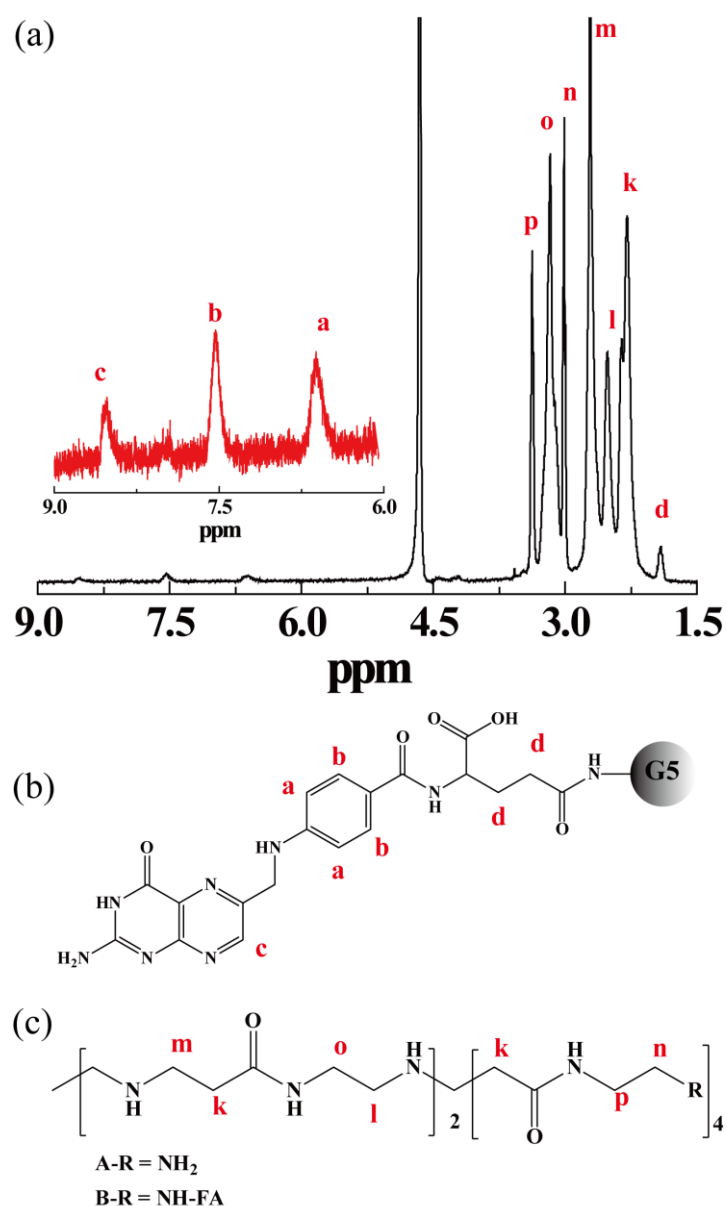

**Figure S1.** <sup>1</sup>H NMR spectrum of G5.NH<sub>2</sub>-FA dendrimers (a). (b) and (c) show the structure of FA-linked G5 dendrimer and the dendrimer repeating units, respectively.

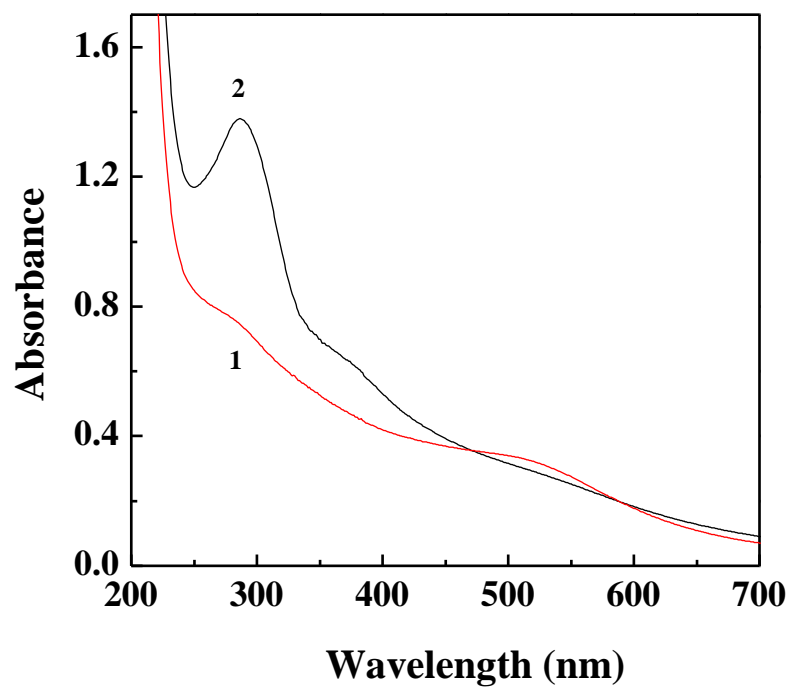

**Figure S2.** UV-Vis spectra of Au DENPs (1) and Au DENPs-FA (2).
